**Title of the Withdrawn Manuscript:**

Modified one-step conservative surgery for placenta accreta spectrum versus caesarean hysterectomy: The CMNT PAS prospective comparative Non-Randomized pilot study

**Authors and Affiliations:**

Hassine S ABOUDA, MD<sup>1,2</sup>

Haithem ALOUI, MD<sup>1,2</sup>

Sofiene B MARZOUK, MD<sup>1,3</sup>

Hatem FRIKHA, MD<sup>1,2</sup>

Rami HAMMAMI, MD<sup>1,2</sup>

Khaoula MAKDOUD, MD<sup>1,2</sup>

Sana MINJLI, MD<sup>1,2</sup>

Badis CHENNOUFI, MD<sup>1,2</sup>

Abir KAROUI, MD<sup>1,2</sup>

Hayen MAGHREBI, MD<sup>1,3</sup>

<sup>1</sup> University of Tunis El Manar, Faculty of Medicine of Tunis

Tunis Maternity and Neonatology Center

<sup>2</sup> Department 'C' of Gynaecology and Obstetrics

<sup>3</sup> Department of Anaesthesiology and Intensive Care

Tunis, Tunisia

**Withdrawal Statement:**

The authors have withdrawn their manuscript owing to [Since its posting, we have identified significant statistical errors resulting from a mix-up between data from the pilot study and the main study. Given these inaccuracies, we believe it is in the best interest of the scientific community to withdraw the manuscript. We have since corrected these errors in a revised version of the manuscript]. Therefore, the authors do not wish this work to be cited as reference for the project. If you have any questions, please contact the corresponding author.
